# Supplementary material for: Novel electrocatalytic activity in layered Ni–Cu nanowire arrays
Source: Royal Society of Chemistry journal article supplement (doi:10.1039/b309624f), 2003-01-01
Supplement: b309624f.doc [file b309624f.doc]

Supporting information

Figure 3 shows the voltammograms of pre-reduced Ni nanowires, Cu nanowires and bulk Cu in pH 4.5 phosphate buffer. It can be seen that the dissolved oxidation potential of Ni is negative to that of Cu. Due to the large redox peak current, the large iR compensation exists and the difference of redox peak potentials is large. There are two oxidation waves in CV of bulk Cu at more positive anodic potential limit, which may indicate the oxidation of Cu proceeding in two steps under the experimental condition.

**Fig. 3.** CVs of Cu nanowires (solid), Ni nanowires (dotted) and bulk Cu (dashed) in 0.1 M phosphate buffer at pH 4.5. Scan rate: 50 mV/s
